# Supplementary material for: Optimization of the genetic code expansion technology for intracellular labelling and single-molecule tracking of proteins in genomically re-coded E. coli
Source: RSC Chem Biol. 2025 Nov 24;7(2):269–85. doi: 10.1039/d5cb00221d (PMC12684252; doi:10.1039/d5cb00221d)
Supplement: CB-007-D5CB00221D-s003 [file CB-007-D5CB00221D-s003.xlsx]

## Sheet: Content
	SUPPLEMENTARY MATERIAL for:
	Optimization of the genetic code expansion technology for intracellular labelling and single-molecule tracking of proteins in genomically re-coded E. coli
	Filip Ilievski, Linnea Wikström, Anneli Borg, Ivan L. Volkov, Gerrit Brandis, Magnus Johansson
	Department of Cell and Molecular Biology, Uppsala University
	Correspondence: m.johansson@icm.uu.se
	This file includes:
	Supplementary Table 2
	Supplementary Table 3
	Supplementary Table 4
	Supplementary Table 5
	Supplementary Table 6

## Sheet: Supplementary_Table_2
	Description of strains used in this study
Strain	Genotype	Origin
GRE1	C321.ΔA.M9adapted	Addgene plasmid # 98568
GRE2	GRE1 (bioAB+ tolC+, galK+)	This study
GRE3	GRE2 (rph+, ybhb+, flge+ )	This study
GRE4	GRE3 (ftsA-G124E, yeeJ-S1467P )	This study
GRE5	GRE4 (ilvG+, bamA-S763P, leuS-F613V, gpp-H134A)	This study
GRE6	GRE5 (prfcp+)	This study

## Sheet: Supplementary_Table_3
		Oligonucleotides used for catsacB gene fragment insertion. The nomenclature of the oligos follows ‘gene_catsacb_direction’ or ‘gene_direction’ for sequencing primers. The rest of the oligos are used for sequencing. ‘for’ or ‘f’ is abbreviation for ‘forward primer’ and ‘rev’ or ‘r’ is abbreviation for ‘reverse primer’. ‘cPCR’ are denoting primers used for colony PCR
	Oligonucleotide name	Oligonucleotide sequence 5'-3'
	mutS_forward	ATCACACCCCATTTAATATCAGGGAACCGGACATAACCCCATGAGTGCAATAGAAAATTT
	mutS_reverse	GTTAATATTCCCGATAGCAAAAGACTATCGGGAATTGTTATTACACCAGGCTCTTCAAGC
	mutS_catsacb_f	GTGCAATAGAAAATTTCGACGCCCATACGCCCATGATGCAATGGAGAAAAAAATCACGGG
	mutS_catsacb_r	GTTAATATTCCCGATAGCAAAAGACTATCGGGAATTGTTAATTATTTGTTAACTGTTAAT
	mutS_seq_f	CCCTGAAATGATTAACTCCG
	mutS_seq_r	GCGTGTAGATGGCATGGTTT
	biotin_for	GTTTGATCAGAAGGACGTTGA
	biotin_reverse	CGTTACTGGAAAAGTTCAGA
	mutS_catsacb_f_1	GTGCAATAGAAAATTTCGACGCCCATACGCCCATGGTGTAGGCTGGAGCTGCTTC
	mutS_catsacb_r_1	CCCGATAGCAAAAGACTATCGGGAATTGTTACATATGAATATCCTCCTTAGTTCC
	bio_cPCR_f	ACTGCAACGCCATTTTCATC
	bio_cPCR_r	TTCAAACAGCAGATCCAGCA
	mutS_cPCR_r	TTCTGCATACAGCAGTTCCG
	CSB_tolC_for	TGTTAATGTCCTGGCACTAATAGTGAATTAAATGTGTGTAGGCTGGAGCTGCTTC
	CSB_tolC_rev	TTTTGTCTTCCGGGACCAGTGGTAAATACCCATCACATATGAATATCCTCCTTAGTTCC
	tolC_forward	TTTTGCCAAATGTAACGGGCAGGTTGTCTGGCTTAAGCATTGTTAATGTCCTGGCACTAA
	tolC_reverse	TGCGGAACGATGCGTGGCGTATGGATTTTGTCCGTTTCATTTTTGTCTTCCGGGACCAGT
	tolC_cPCR_forw	TTATGCCCACTCATTTTTTAACG
	tolC_seq_for	TTTCACCCTCTTCAATCATCCC
	tolC_mid_F	ACCGGGATTTCTGACACCTC
	tolC_mid_rev	AGAAGCCGTTAAATCCAGAG
	tolC_seq_rev	TCACGGGTGGCGTATTTCG
	tolC_cPCR_rev	GCGTCGGTATATTTACCGTA
	gal_CSB_for	GAACAATATGAGATAAAGCCCTCATGACGAGGGCGTAACAGTGTAGGCTGGAGCTGCTTC
	gal_CSB_rev	GCTATGGTTATTTCATACCATAAGCCTAATGGAGCGAATTCATATGAATATCCTCCTTAGTTCC
	gal_rev	GCTATGGTTATTTCATACCATAAGCCTAATGGAGCGAATTATGAGAGTTCTGGTTACCGG
	gal_for	GAACAATATGAGATAAAGCCCTCATGACGAGGGCGTAACATTACTCAGCAATAAACTGAT
	gal_cPCR_for	ACGGTTTTCTTTGTTCCACT
	galK_seq_for	GTTCACAATCTGCCAGCGAC
	galK_mid_for	ACAGCCACACCTTTGGGCAT
	galK_mid_rev	CGTCATCATCAACAGTAACT
	galK_seq_rev	ACGGCGCGCCATTTAATGGCG
	gal_cPCR_rev	CTTTTTTCAGATAAAAAGCG

## Sheet: Supplementary_Table_4
	Oligonucleotides used for multiplex genome editing used in this study. MGE oligos are denoted with ‘MAGE’ suffix. The nomenclature of the oligos follows ‘gene_MAGE’ or ‘gene_direction’ for sequencing primers. * denotes phosphothionated oligo at the 5’ end. ‘for’ or ‘f’ is abbreviation for ‘forward primer’ and ‘rev’ or ‘r’ is abbreviation for ‘reverse primer’. Colony PCR was performed using the se…
Oligonucleotide name	Oligonucleotide sequence 5'-3'
rph_MAGE_1	A*G*TGATGACCGAAGACGGGCGCATCATTGAAGTGCAGGGGACGGCAGAAGGCGAGCCGTTCACCCATGAAGAGCTACTCATCTTGTTGGC
flge_MAGE_C	C*A*TCAGGGTATTCGGGATCGAAATATTGGTCGGATTCGCCCCTTGCTGAATAGTCGGCGGCGTACCGGTTGCCGGGTAACCCGTCAGCTG
ybhb_MAGE_C	C*T*GGGTAGTTGTTAACTTACCCGCTGATACCCGCGTATTACCGCAAGGGTTTGGCTCTGGTCTGGTAGCAATGCCAGACGGCGTTTTG
rph_MAGE_2	A*A*CGTAGTGATGACCGAAGACGGGCGCATCATTGAAGTGCAGGGGACGGCAGAAGGCGAGCCGTTCACCCATGAAGAGCTACTCATCTTG
prfC_insertion	TTGCCTCCCCCCCGTTGATGGGTAAAATAGCCGCAATTTTTCGTTTTCAACAAGCGCGGCGCGATGCCGCTTACTCAAGAAGAAAGAATT
prfC_seq_for	GACCTGCTGGCTGAATGCACACCATCGCGA
prfC_seq_rev	TCACCAACCGCAGCATCGAGATCCGGGTTA
ftsA_MAGE	G*G*GATCACATGCAGCACACGATGTTCATCGCGCACACGCACCGATTTCGCGGTATGGACGACGTTTTCCACATCTTCTTGCGT
ftsA_for	AGTAGGCTGGGCGCCCTTGCC
ftsA_rev	TGTGCCTGTCGCCTGAGGCC
yeeJ_MAGE	C*G*AACGTCGCGAATGCTGAAATCACGCTGGCAGCCTCGAAGGATCCTGTGATTGCCGACAATAACGATCTCACGACACTAACAGCAACAG
yeeJ_for	TCGTTCAGGGAAGGTAAGC
yeeJ_rev	TAAGAAATTATAACGGAAAA
yeeJ_mid	AACCCTCAGCGTTTCACCAA
leuS_MAGE	A*A*GGCCGTATCGTGAAAGCGAAAGATGCGGCAGGCCATGAACTGGTTTATACCGGCATGAGCAAAATGTCCAAGTCGAAGAACAACGGTA
leuS_rev	CACTGGCTGCCATGCAAGAG
leuS_for	GATATCGCACGCTTCCTCCC
bamA_MAGE	C*A*TCCATTGTAATGCGATACCCGCAGACATACGGATATTGCTTGGATCACTATAGTCCGGATATCCAGAATATTGGCTGGAATCCCAGTT
bamA_rev	ACTACATTCCTTTGTGGAGA
bamA_for	GTTAGGAAGAACGCATAATA
gpp_MAGE	A*A*GCACGTCTGATTTATCAGGGCGTTGCTCACACCACTGGTGGTGCCGATCAGCGCCTGGTGGTGGATATAGGCGGAGCCAGTACTGAAC
gpp_rev	TTGAAGGATGAAGAGTATGG
gpp_for	GGCCGGAAAAGATGCGTCAG
ilvG_MAGE	T*A*ACGCCAGGAATGTTCATCACGCAGCTGCGCGCAGTGTTGCTGCCAGTCATTGATATTTAACGGCTGCTGTAATGCTGGTAACAGAGCA
ilvG_for	GAACTAACTATGAATGGCGCA
ilvG_rev	ATTGACCTGATGTTGCATCA

## Sheet: Supplementary_Table_5
Oligonucleotide name	Oligonucleotide sequence
pEVOL_giant1_for	TTGCACCATTCGATGGTGTCCAATAACTGCCTTAAAAAAATTACGCCCCGCC
pEVOL_giant1_rev	AGCAAATAAATTTTTTATGACTGAGCTGCTCGAGCATGC
pQE_g1_fixed_r	TGCATGCTCGAGCAGCTCAGTCATAAAAAATTTATTTGCTTTGTGAGCGGATAACAATTATAATAGATTC
pQE_g2_f	GGCTTCCCGGTATCAACAGGTCATAAAAAATTTATTTGCTTTGTGAGCGGATAACAATTATAATAGA
s1_pEVOL_for	TGAACGGCGCCAAGATTAATGTCGACCATCATCATCATCATCATTGAGT
s1_pEVOL_rev	TCGGTGTACTTGACCGTCATAGATCTAATTCCTCCTGTTAGCCCAAAAAA
s1_M.alvus_for	TGATGATGATGATGGTCGACATTAATCTTGGCGCCGTTCAAGTAACTGATGG
s1_M.alvus_rev	TAACAGGAGGAATTAGATCTATGACGGTCAAGTACACCGATGC
s2_pEVOL_for	TGAACGGCGCCAAGATTAATCTGCAGTTTCAAACGCTAAATTGCC
s2_pEVOL_rev	TCGGTGTACTTGACCGTCATATGGGATTCCTCAAAGCGTAAACAAC
s2_Malvus_rev	TACGCTTTGAGGAATCCCATATGACGGTCAAGTACACCGA
s2_Malvus_for	TTTAGCGTTTGAAACTGCAGATTAATCTTGGCGCCGTTCAAG
s3_pEVOL_for	GACGCCCCGGTCTCTCGCCAAATTCGAAAAGCCTGCTCA
s3_pEVOL_rev	TGGTCGCCGGACCGTCCCCCAATGCGGGGCGC
s3_tRNA_for	AGTAAGATGCGCCCCGCATTGGGGGACGGTCCGG
s3_tRNA_rev	TTGAGCAGGCTTTTCGAATTTGGCGAGAGACCGGGG
pALIP_v_f	GAATTGTGAGCGGATAACAAACCCGTTTTTTTGGGCTAACAG
pALIP_v_r	AGCCGATGATTAATTGTCAATTGGGTACCAAGCTTATCGATGATAAGCTGTCAAAC
pMEGA_f_for	TCGATAAGCTTGGTACCCAATTGACAATTAATCATCGGCTCGTATAATGTG
pMEGA_f_rev	GTTAGCCCAAAAAAACGGGTTTGTTATCCGCTCACAATTCCACAC
aaRS_rem_rev	/5Phos/ATATTAAAGCGGGACAGGCTGACAA
Remove_aaRS_for	/5Phos/CATGTGAGCACCGGTTTATTGACTA
lacY_mod_for	AGGAGAAATTAACTATGGGCATGTACTATTTAAAAAACACAAACTTTTGGATGTTCGG
lacY_mod_rev	ATCTATCAACAGGAGTCTTAGCTCGCACCGCCATT
ALIP_lacY_for	AAAAGAATGGCGGTGCGAGCTAAGACTCCTGTTGATAGATCCAGTAATGACC
ALIP_lacY_rev	GTGTTTTTTAAATAGTACATGCCCATAGTTAATTTCTCCTCTTTAATGAATTCTG
aFAB120_for	/5Phos/ATTCAATTGTGAGCGGATAACAATTTCACAC
aFAB120_rev	/5Phos/TCCACACATTATAGGTACAAAAAGATGCGATGTCGATTTCTCGAGGTGAAGACGAAAGGG
pASK_mCherry_v_for	TTGCACCATTCGATGGTGTCTTAACAAAATTTGGCGAAAATGAGACGTTGA
pASK_mCherry_v_rev	GTCATGATCTAATTCCTCCTTTTTTGCCCTCGTTATCTAGATTTTTGTCGAACTAT
EVOL_ALIP_f_for_TET	CTAGATAACGAGGGCAAAAAAGGAGGAATTAGATCATGACGGTCAAGTAC
EVOL_ALIP_f_rev_TET	TTTTCGCCAAATTTTGTTAAGACACCATCGAATGGTGCAAAAC
aFab83_for	/5Phos/TGACTTTCTCGCCGATCAAAAAAAAATTTATTTGCTTTAAAGTCTAACCTATAGGTAGATTTAACGTAT
aFab83_rev	/5Phos/GCACGGCTAACTAAGCGGCCTGC
UAG_Halo_v_f	CGCTCGAGATTTCCGGCTGAGACTCCTGTTGATAGATCCAGTAATGAC
UAG_Halo_v_r	CCAGTACCGATTTCTGCCATGCTCGCACCGCCA
UAG_Halo_f_f	AGAAGAATGGCGGTGCGAGCATGGCAGAAATCGGTACTGGC
UAG_Halo_f_r	TGGATCTATCAACAGGAGTCTCAGCCGGAAATCTCG
AAA_Halo_f_f	AAAAGAATGGCGGTGCGAGCATGGCAGAAATCGGTACTGGC

## Sheet: Supplementary_Table_6
Plasmid name	Plasmid description	Cloning method	Template for fragment #1 PCR	Oligonucleotides for fragment #1 PCR	Template for fragment #2 PCR	Oligonucleotides for fragment #2 PCR
pFI1_PylRS1_UAG_SCFP and pFI1_PylRS1_AAA_SCFP	Arabinose induction of copy 1 of PylRS1, constitutive expression of copy 2 of PylRS1, IPTG induction of UAG-SCFP or AAA-SCFP (positive control) reporter	Gibson Assembly	pQE30lacIq_UAG-SCFP or pQE30lacIq_AAA-SCFP	pQE_g1_fixed_r, pQE_g2_f	pEVOL_PylRS1	pEVOL_giant1_for, pEVOL_giant1_rev
pFI1_PylRS2_UAG_SCFPand pFI1_PylRS2_AAA_SCFP	Arabinose induction of copy 1 of PylRS2, constitutive expression of copy 2 of PylRS2, IPTG induction of UAG-SCFP or AAA-SCFP (positive control) reporter	Gibson Assembly	pQE30lacIq_UAG-SCFP or pQE30lacIq_AAA-SCFP	pQE_g1_fixed_r, pQE_g2_f	pEVOL_PylRS2	pEVOL_giant1_for, pEVOL_giant1_rev
pFI1_PylRS3_UAG_SCFP (pFI1) and pFI1_PylRS3_AAA_SCFP (pFI1+)	Arabinose induction of copy 1 of PylRS3, constitutive expression of copy 2 of PylRS3, IPTG induction of UAG-SCFP or AAA-SCFP (positive control) reporter	Gibson Assembly	pQE30lacIq_UAG-SCFP or pQE30lacIq_AAA-SCFP	pQE_g1_fixed_r, pQE_g2_f	pEVOL_PylRS3	pEVOL_giant1_for, pEVOL_giant1_rev
pFI2	IPTG induction of copy 1 of PylRS3, constitutive expression of copy 2 of PylRS3, IPTG induction of UAG-SCFP reporter	Gibson Assembly	pMEGA-MaPylRS (Addgene plasmid #200225	pMEGA_f_for, pMEGA_f_rev	pFI1	pALIP_v_f, pALIP_v_r
pFI3	Arabinose induction of copy 1 of PylRS3, IPTG induction of UAG-SCFP or AAA-SCFP (positive control) reporter	T4 ligation of a linearized plasmid	pFI1_PylRS3_UAG_SCFP (pFI1) and pFI1_PylRS3_AAA_SCFP (pFI1+)	aaRS_rem_rev, Remove_aaRS_for	-	-
pFI4	Constitutive expression of copy 1 of PylRS3 under aFab120 promoter, IPTG induction of UAG-SCFP	T4 ligation of a linearized plasmid	pFI1	aFab120_for, aFab120_rev	-	-
pFI5	Anhydrotetracycline induction of copy 1 of PylRS3, IPTG induction of UAG-SCFP or AAA-SCFP (positive control) reporter	Gibson Assembly	pASK_mCherry	EVOL_ALIP_f_for_TET, EVOL_ALIP_f_rev	pFI1	pASK_mCherry_v_for, pASK_mCherry_v_for,
pFI6	Constitutive expression of copy 1 of PylRS3 under aFab120 promoter, constitutive expression of tRNA unider aFab83 promoter, IPTG induction of UAG-SCFP	T4 ligation of a linearized plasmid	pFI4	aFab83_for, aFab83_rev	-	-
pFI7	Constitutive expression of copy 1 of PylRS3 under aFab120 promoter, IPTG induction of 26UAG-SCFP	Gibson Assembly	pQE30lacIq_26UAG-SCFP	pQE_g1_fixed_r, pQE_g2_f	pFI4	pEVOL_giant1_for, pEVOL_giant1_rev
pFI8	Constitutive expression of copy 1 of PylRS3 under aFab120 promoter, IPTG induction of 45UAG-SCFP	Gibson Assembly	pQE30lacIq_45UAG-SCFP	pQE_g1_fixed_r, pQE_g2_f	pFI4	pEVOL_giant1_for, pEVOL_giant1_rev
pFI4_UAG_Halo	Constitutive expression of copy 1 of PylRS3, IPTG induction of UAG-Halo	Gibson Assembly	https://www.pnas.org/doi/full/10.1073/pnas.2204038119	UAG_Halo_f_f, UAG_Halo_f_r	pFI4	UAG_Halo_v_f, UAG_Halo_v_r
pFI4_AAA_Halo	Constitutive expression of copy 1 of PylRS3, IPTG induction of AAA-Halo	Gibson Assembly	https://www.pnas.org/doi/full/10.1073/pnas.2204038119	AAA_Halo_f_f, UAG_Halo_f_r	pFI4	pEVOL_giant1_for, pEVOL_giant1_rev
pFI4_LacY_UAG_Halo	Constitutive expression of copy 1 of PylRS3, IPTG induction of LAcY_UAG_Halo	PCR mutagenesis	https://www.pnas.org/doi/full/10.1073/pnas.2204038119	lacY_mod_for, lacY_mod_rev	pFI4	pEVOL_giant1_for, pEVOL_giant1_rev
pEVOL_PylRS2	Arabinose induction of copy 1 of PylRS2, constitutive expression of copy 2 of PylRS2	Gibson Assembly	pEVOL_M.mazei-PylRS1	s1_pEVOL_for, s1_pEVOL_rev, s2_pEVOL_for, s2_pEVOL_rev, s3_pEVOL_for, s3_pEVOL_rev	https://pubs.acs.org/doi/10.1021/acssynbio.9b00288	s1_M.alvus_for, s1_M.alvus_rev, s2_M.alvus_for, s2_M.alvus_rev, s3_M.alvus_for, s3_M.alvus_rev
pEVOL_PylRS3	Arabinose induction of copy 1 of PylRS2, constitutive expression of copy 2 of PylRS2	Gibson Assembly	pEVOL_M.mazei-PylRS1	s1_pEVOL_for, s1_pEVOL_rev, s2_pEVOL_for, s2_pEVOL_rev, s3_pEVOL_for, s3_pEVOL_rev	https://pubs.acs.org/doi/10.1021/acssynbio.9b00288	s1_M.alvus_for, s1_M.alvus_rev, s2_M.alvus_for, s2_M.alvus_rev, s3_M.alvus_for, s3_M.alvus_rev
						IF2-γ-F, pQE-IF2-R
						HaloTag-IF2α-F, HaloTag-IF2α-R
						-
						IF3-F, IF3-R
						HaloTag-IF3-F, HaloTag-IF3-R
						HaloTag-IF1-F, HaloTag-IF1-R
						-
						-
						-
						-
						-
